# Supplementary material
Source: PubMed Central journal article supplement (PMC9661446)
Supplement: NIHMS1839661-supplement-supplement.pdf [file NIHMS1839661-supplement-supplement.pdf]

## Supplemental Online Content

Samsky MD, Morrow DA, Proudfoot AG, Hochman JS, Thiele H, Rao SV. Cardiogenic Shock After Acute Myocardial Infarction. *JAMA*. Published online November 9, 2021.  
doi:10.1001/jama.2021.18323

**eFigure.** Management of Cardiogenic Shock Associated With Acute Myocardial Infarction

This supplemental material has been provided by the authors to give readers additional information about their work.

SIZE OF TREATMENT EFFECT

| ESTIMATE OF CERTAINTY (PRECISION) OF TREATMENT EFFECT                                                                  | SIZE OF TREATMENT EFFECT                                                                                                                                                                       |                                                                                                                                                                                                                     |                                                                                                                                                                                                          |                                                                                                                                                                                                                                                                                                                                   |                                                                                                                                                                  |                 |           |                     |             |                   |               |                                    |                     |
|------------------------------------------------------------------------------------------------------------------------|------------------------------------------------------------------------------------------------------------------------------------------------------------------------------------------------|---------------------------------------------------------------------------------------------------------------------------------------------------------------------------------------------------------------------|----------------------------------------------------------------------------------------------------------------------------------------------------------------------------------------------------------|-----------------------------------------------------------------------------------------------------------------------------------------------------------------------------------------------------------------------------------------------------------------------------------------------------------------------------------|------------------------------------------------------------------------------------------------------------------------------------------------------------------|-----------------|-----------|---------------------|-------------|-------------------|---------------|------------------------------------|---------------------|
|                                                                                                                        | CLASS I<br><i>Benefit &gt;&gt;&gt; Risk</i><br>Procedure/Treatment <b>SHOULD</b> be performed/ administered                                                                                    | CLASS IIa<br><i>Benefit &gt;&gt; Risk</i><br><i>Additional studies with focused objectives needed</i><br><b>IT IS REASONABLE</b> to perform procedure/administer treatment                                          | CLASS IIb<br><i>Benefit ≥ Risk</i><br><i>Additional studies with broad objectives needed; additional registry data would be helpful</i><br>Procedure/Treatment <b>MAY BE CONSIDERED</b>                  | CLASS III <i>No Benefit</i> or CLASS III <i>Harm</i>                                                                                                                                                                                                                                                                              |                                                                                                                                                                  |                 |           |                     |             |                   |               |                                    |                     |
|                                                                                                                        |                                                                                                                                                                                                |                                                                                                                                                                                                                     |                                                                                                                                                                                                          | <table border="1"> <thead> <tr> <th></th> <th>Procedure/ Test</th> <th>Treatment</th> </tr> </thead> <tbody> <tr> <td>COR III: No benefit</td> <td>Not Helpful</td> <td>No Proven Benefit</td> </tr> <tr> <td>COR III: Harm</td> <td>Excess Cost w/o Benefit or Harmful</td> <td>Harmful to Patients</td> </tr> </tbody> </table> |                                                                                                                                                                  | Procedure/ Test | Treatment | COR III: No benefit | Not Helpful | No Proven Benefit | COR III: Harm | Excess Cost w/o Benefit or Harmful | Harmful to Patients |
|                                                                                                                        |                                                                                                                                                                                                | Procedure/ Test                                                                                                                                                                                                     | Treatment                                                                                                                                                                                                |                                                                                                                                                                                                                                                                                                                                   |                                                                                                                                                                  |                 |           |                     |             |                   |               |                                    |                     |
| COR III: No benefit                                                                                                    | Not Helpful                                                                                                                                                                                    | No Proven Benefit                                                                                                                                                                                                   |                                                                                                                                                                                                          |                                                                                                                                                                                                                                                                                                                                   |                                                                                                                                                                  |                 |           |                     |             |                   |               |                                    |                     |
| COR III: Harm                                                                                                          | Excess Cost w/o Benefit or Harmful                                                                                                                                                             | Harmful to Patients                                                                                                                                                                                                 |                                                                                                                                                                                                          |                                                                                                                                                                                                                                                                                                                                   |                                                                                                                                                                  |                 |           |                     |             |                   |               |                                    |                     |
| LEVEL A<br>Multiple populations evaluated*<br>Data derived from multiple randomized clinical trials or meta-analyses   | <ul style="list-style-type: none"> <li>Recommendation that procedure or treatment is useful/effective</li> <li>Sufficient evidence from multiple randomized trials or meta-analyses</li> </ul> | <ul style="list-style-type: none"> <li>Recommendation in favor of treatment or procedure being useful/effective</li> <li>Some conflicting evidence from multiple randomized trials or meta-analyses</li> </ul>      | <ul style="list-style-type: none"> <li>Recommendation's usefulness/efficacy less well established</li> <li>Greater conflicting evidence from multiple randomized trials or meta-analyses</li> </ul>      | <ul style="list-style-type: none"> <li>Recommendation that procedure or treatment is not useful/effective and may be harmful</li> <li>Sufficient evidence from multiple randomized trials or meta-analyses</li> </ul>                                                                                                             |                                                                                                                                                                  |                 |           |                     |             |                   |               |                                    |                     |
| LEVEL B<br>Limited populations evaluated*<br>Data derived from a single randomized trial or nonrandomized studies      | <ul style="list-style-type: none"> <li>Recommendation that procedure or treatment is useful/effective</li> <li>Evidence from single randomized trial or nonrandomized studies</li> </ul>       | <ul style="list-style-type: none"> <li>Recommendation in favor of treatment or procedure being useful/effective</li> <li>Some conflicting evidence from single randomized trial or nonrandomized studies</li> </ul> | <ul style="list-style-type: none"> <li>Recommendation's usefulness/efficacy less well established</li> <li>Greater conflicting evidence from single randomized trial or nonrandomized studies</li> </ul> | <ul style="list-style-type: none"> <li>Recommendation that procedure or treatment is not useful/effective and may be harmful</li> <li>Evidence from single randomized trial or nonrandomized studies</li> </ul>                                                                                                                   |                                                                                                                                                                  |                 |           |                     |             |                   |               |                                    |                     |
| LEVEL C<br>Very limited populations evaluated*<br>Only consensus opinion of experts, case studies, or standard of care | <ul style="list-style-type: none"> <li>Recommendation that procedure or treatment is useful/effective</li> <li>Only expert opinion, case studies, or standard of care</li> </ul>               | <ul style="list-style-type: none"> <li>Recommendation in favor of treatment or procedure being useful/effective</li> <li>Only diverging expert opinion, case studies, or standard of care</li> </ul>                | <ul style="list-style-type: none"> <li>Recommendation's usefulness/efficacy less well established</li> <li>Only diverging expert opinion, case studies, or standard of care</li> </ul>                   | <ul style="list-style-type: none"> <li>Recommendation that procedure or treatment is not useful/effective and may be harmful</li> <li>Only expert opinion, case studies, or standard of care</li> </ul>                                                                                                                           |                                                                                                                                                                  |                 |           |                     |             |                   |               |                                    |                     |
| Suggested phrases for writing recommendations                                                                          | should<br>is recommended<br>is indicated<br>is useful/effective/beneficial                                                                                                                     | is reasonable<br>can be useful/effective/beneficial<br>is probably recommended<br>or indicated                                                                                                                      | may/might be considered<br>may/might be reasonable<br>usefulness/effectiveness is unknown/unclear/uncertain<br>or not well established                                                                   | COR III:<br>No Benefit<br><hr/> is not recommended<br>is not indicated<br>should not be performed/<br>administered/<br>other<br><hr/> is not useful/<br>beneficial/<br>effective                                                                                                                                                  | COR III:<br>Harm<br><hr/> potentially harmful<br>causes harm<br>associated with excess morbidity/mortality<br>should not be performed/<br>administered/<br>other |                 |           |                     |             |                   |               |                                    |                     |
| Comparative effectiveness phrases†                                                                                     | treatment/strategy A is recommended/indicated in preference to treatment B<br>treatment A should be chosen over treatment B                                                                    | treatment/strategy A is probably recommended/indicated in preference to treatment B<br>it is reasonable to choose treatment A over treatment B                                                                      |                                                                                                                                                                                                          |                                                                                                                                                                                                                                                                                                                                   |                                                                                                                                                                  |                 |           |                     |             |                   |               |                                    |                     |
